# Supplementary material for: Corrections and Additions to Descriptions of Some Species of the Subgenus <em>Orthocladius s.</em> str. (Diptera, Chironomidae, Orthocladiinae)
Source: Preprints.org preprint supplement (doi:10.20944/preprints202112.0146.v1), 2021-12-09
Supplement: Supplementary file 1 [file supplementary]

## Sheet: distrib
seq	ref	genus species author	nomenclature notes	taxonomic notes	adult males	pupal exuviae	larvae	DNAbarcode	westpalaearctic(WP)	WP detail	eastpalaearctic	nearctic	oriental
1	[1]	Orthocladius van der Wulp, 1874
2	[1]	Orthocladius subg. Mesorthocladius Saether, 2005
3	[1]	Orthocladius (Mesorthocladius) brevinervis (Linevich in Linevich, Makarchenko & Alexandrov, 2002)									esib
4	[37]	Orthocladius (Mesorthocladius) ebrius Makarchenko et Makarchenko, 2012									fe
5	[1]	Orthocladius (Mesorthocladius) frigidus (Zetterstedt, 1838)			[6,9]	[6,8,10]	[22,31]		eur	Italy	fe	n
6	[1]	Orthocladius (Mesorthocladius) klishkoae Makarchenko et Makarchenko, 2008									fe
7	[1]	Orthocladius (Mesorthocladius) lamellatus Sæther, 2005									fe	n
8	[1]	Orthocladius (Mesorthocladius) nimidens Sæther, 2005										n
9	[1]	Orthocladius (Mesorthocladius) roussellae Soponis, 1990									fe
10	[1]	Orthocladius (Mesorthocladius) Sæther, 2005
11	[1]	Orthocladius (Mesorthocladius) vaillanti Langton & Cranston, 1991			[6,18,27]	[6,8,10,18]	[19]		eur	Italy	fe	n
12	[1]	Orthocladius subg. Orthocladius van der Wulp, 1874
13	[1]d	Orthocladius (Orthocladius) algerinus Marcuzzi, 1950	nomen dubium
14	[27]	Orthocladius (Orthocladius) antennalis (Kieffer, 1921)	junior syn H.distylus
15	[1]	Orthocladius (Orthocladius) appersoni Soponis, 1977	n. comb.								fe	n
16	[1]j	Orthocladius (Orthocladius) aquilonaris Goetghebuer, 1940	junior syn O.O.nitidoscutellatus
17	[1]j	Orthocladius (Orthocladius) atripluma Kieffer, 0	junior syn O.O.glabripennis
18	[1]	Orthocladius (Orthocladius) biwainfirmus Sasa & Nishino, 1995							Jap
19	[1]j	Orthocladius (Orthocladius) breviseta Kieffer, 1923	junior syn O.O.rubicundus, senior primary homonym Saether, 1969						eur	N.Semlia
20	[1]	Orthocladius (Orthocladius) carlatus (Roback, 1957)	n. comb.	near rubicundus	[7]	[7]	[7]		eur			n
21	[1]	Orthocladius (Orthocladius) charensis Soponis, 1977	n. comb.									n
22	[1]	Orthocladius (Orthocladius) chuzeseptimus Sasa, 1984							Jap
23	[1]	Orthocladius (Orthocladius) chuzesextus Sasa, 1984							Jap		fe
24	[1]	Orthocladius (Orthocladius) clarkei Soponis, 1977		virga absent	[7]	[7]	[7]		eur	Romania Russia		n
25	[1]	Orthocladius (Orthocladius) cognatus Makarchenko et Makarchenko, 2006									fe
26	[1]	Orthocladius (Orthocladius) cooki Soponis, 1977	n. comb.									n
27	[27]	Orthocladius (Orthocladius) corax (Kieffer, 1924)	n. comb. Hydrobaenus corax		[27]
28	[1]j	Orthocladius (Orthocladius) curtiseta Sæther, 1990	junior syn O.O.rubicundus
29	[1]	Orthocladius (Orthocladius) decoratus (Holmgren, 1869)			[6,20,25]	[6,8]		76	eur	Italy	esib	n
30	[1]	Orthocladius (Orthocladius) defensus Makarchenko et Makarchenko, 2006									fe
31	[1]	Orthocladius (Orthocladius) deflectus Bhattachayay, Ali & Chaudhuri, 1991											o
32	[1]d	Orthocladius (Orthocladius) dentatus Kieffer, 1923	nomen dubium
33	[1]	Orthocladius (Orthocladius) dentifer Brundin, 1947	n. comb.		[5,6,24]	[6,8]	[7]		eur	Italy	esib	n
34	[1]j	Orthocladius (Orthocladius) dispar Goetghebuer, 1915	junior syn O.O.rhyacobius
35	[1]	Orthocladius (Orthocladius) dorenus (Roback, 1957)	n. comb.								mongolia	n
36	[0]	Orthocladius (Orthocladius) excavatus Brundin, 1947			[6,24]	[6,8]	[0]	3	eur	Italy		n
37	[1]	Orthocladius (Orthocladius) ferringtoni Soponis, 1983										n
38	[1]	Orthocladius (Orthocladius) filamentosus (Tokunaga, 1939)							Jap
39	[1]	Orthocladius (Orthocladius) glabripennis (Goetghebuer, 1921)			[25,27]	[8,10]	[0]	9	eur	Italy
40	[1]	Orthocladius (Orthocladius) gregarius Linevich, 1970									esib
41	[1]	Orthocladius (Orthocladius) groenlandensis Goetghebuer, 1933	n. comb.									greenland
42	[1]	Orthocladius (Orthocladius) hazenensis Soponis, 1977									fe	n
43	[1]	Orthocladius (Orthocladius) hellenthali Soponis, 1977	n. comb.								esib	n
44	[27]	Orthocladius (Orthocladius) hockayensis Goetghebuer, 1933	n. comb. Pseudorthocladius hockaiensis						eur
45	[1]j	Orthocladius (Orthocladius) incoactus (Walker)	junior syn O.O.rubicundus
46	[1]	Orthocladius (Orthocladius) kamihiroi Sasa & Hirabayashi, 1993							Jap
47	[1]	Orthocladius (Orthocladius) kamisemai Sasa & Hirabayashi, 1993							Jap
48	[1]	Orthocladius (Orthocladius) knabeni Goetghebuer, 1933		no type material	[7]				eur	Sweden Lappland		n Greenland
49	[1]	Orthocladius (Orthocladius) knuthi Soponis, 1977		near decoratus	[7]	[7]	[7]		eur	Svalb		n
50	[1]	Orthocladius (Orthocladius) lapponicus Goetghebuer, 1940	n. comb.		[7]	[7]	[7]	2	eur	Scand		n
51	[1]j	Orthocladius (Orthocladius) lenzi Kieffer, 0	junior Syn O.O.oblidens
52	[1]	Orthocladius (Orthocladius) linevitshae Makarchenko et Makarchenko, 2008									fe
53	[1]	Orthocladius (Orthocladius) maius Goetghebuer, 1942		not separated from other species in [31]	[6]	[6,8,10]	[31]		eur
54	[1]	Orthocladius (Orthocladius) makabensis Sasa, 1979	n. comb.						Jap
55	[1]	Orthocladius (Orthocladius) mallochi Kieffer, 1919	n. comb.									n
56	[1]	Orthocladius (Orthocladius) manitobensis Sæther, 1969	n. comb.									n
57	[1]	Orthocladius (Orthocladius) marchettii Rossaro & Prato, 1991			[6]	[6,28]	[0]		eur	Italy
58	[1]j	Orthocladius (Orthocladius) mariellae Rossaro, 1992	junior syn O.O.rivinus
59	[1]d	Orthocladius (Orthocladius) maurus Kieffer, 1918	nomen dubium
60	[27]	Orthocladius (Orthocladius) mitisi Goetghebuer, 1938	stat. restit. not junior syn. O.O.glabripennis		[27]				eur
61	[1]d	Orthocladius (Orthocladius) mixtus (Holmgren, 1869)	nomen dubium					12	eur	Svalb
62	[1]	Orthocladius (Orthocladius) multidentatus Zelentzov, 1991							Tajikistan
63	[27]	Orthocladius (Orthocladius) muscicola (Kieffer, 1906)	n. comb. Bryophaenocladius muscicola
64	[1]	Orthocladius (Orthocladius) nigritus Malloch, 1915		virga absent SV hooked	[7]	[7]	[7]		eur	Karelia		n
65	[1]	Orthocladius (Orthocladius) nitidoscutellatus Lundström, 1915	senior syn. O.trigonolabis in [8, 25]		[5,25]	[8]	[5]	38	eur		fe	n
66	[1]	Orthocladius (Orthocladius) novostylus Chauduri & Ghosh, 1982											o
67	[27]	Orthocladius (Orthocladius) obesus (Goetghebuer, 1940)	junior syn H.conformis
68	[27]	Orthocladius (Orthocladius) succineus Goetghebuer, 1942	n. comb. Lapposmittia succinea (Goetghebuer, 1942)
69	[0]	Orthocladius (Orthocladius) oblidens (Walker, 1856)		not separated from other species in [31]	[6,29]	[6,8,10]	[0,31]	254	eur	Italy	fe	n
70	[1]	Orthocladius (Orthocladius) obumbratus Johannsen, 1905			[7]	[8,10]	[7,30]					n
71	[1]	Orthocladius (Orthocladius) oliveri Soponis, 1977		virga absent gonostylus as nitidoscutellatus	[7]	[7]	[7]		eur	Romania Russia		n
72	[1]	Orthocladius (Orthocladius) pallidicornis Lundström, 1915		near decoratus							esib
73	[8]	Orthocladius (Orthocladius) Pe 1 Brundin, 1947	Pe
74	[0]	Orthocladius (Orthocladius) pedestris Kieffer, 1909		not separated from other species in [31]	[6]	[8]	[0,31]	3	eur	Italy	fe
75	[1]j	Orthocladius (Orthocladius) persidens Walker, 1856	junior syn O.O.rubicundus
76	[1]j	Orthocladius (Orthocladius) pinderi Rossaro & Prato, 1991	junior syn O.O.oblidens
77	[1]j	Orthocladius (Orthocladius) rachelae Rossaro & Prato, 1991	junior syn O.O.wetterensis
78	[1]	Orthocladius (Orthocladius) rarus Linevich, 2002 in Linevich Makarchenko & Alexandrov									esib
79	[0]	Orthocladius (Orthocladius) rhyacobius Kieffer, 1911	sub O.O.obumbratus in Langton & Visser 2003 misidentif.	not separated from other species in [31]	[6]	[8]	[0,31]	2	eur	Italy
80	[1]j	Orthocladius (Orthocladius) rhyacophilus Kieffer, 1912	junior syn O rhyacobius
81	[0]	Orthocladius (Orthocladius) rivinus Potthast, 1914			[6]	[6,8,10]	[0]	1	eur	Italy
82	[1]	Orthocladius (Orthocladius) robacki Soponis, 1977	n. comb.									n
83	[0]	Orthocladius (Orthocladius) rubicundus (Meigen, 1818)	senior syn. O.saxicola	not separated from other species in [31]	[6,25]	[8,10]	[0,30]	6	eur	Italy	fe	n
85	[1]	Orthocladius (Orthocladius) saetheri Jacobsen, 2007										n
86	[1]	Orthocladius (Orthocladius) sakhalinensis Makarchenko et Makarchenko, 2006									fe
87	[1]j	Orthocladius (Orthocladius) saxicola Kieffer, 1929	junior syn O.rubicundus
88	[1]	Orthocladius (Orthocladius) seiryugeheus Sasa, Suzuki & Sakai, 1999							Jap
89	[1]	Orthocladius (Orthocladius) setosus Makarchenko et Makarchenko, 2006									fe
90	[27]	Orthocladius (Orthocladius) sidowi Goetghebuer, 1941	unavailable name conspecific with O.M.frigidus
91	[1]j	Orthocladius (Orthocladius) sp. A Pinder Pinder, 1978	junior syn O.O.oblidens
92	[1]	Orthocladius (Orthocladius) stagnicola Goetghebuer, 1948	subgenerically unplaced valid species						eur	Belgium
93	[1]	Orthocladius (Orthocladius) subletti Soponis, 1977	n. comb.									n
94	[1]	Orthocladius (Orthocladius) tamanitidus Sasa, 1981	n. comb.						Jap
95	[1]	Orthocladius (Orthocladius) tamaputridus Sasa, 1981							Jap
96	[1]	Orthocladius (Orthocladius) tamarutilus Sasa, 1981	n. comb.						Jap
97	[1]j	Orthocladius (Orthocladius) ticinoi Rossaro & Prato, 1991	junior syn O.O.excavatus
98	[27]	Orthocladius (Orthocladius) timoni Goetghebuer & Timon-David, 1939	not nomen dubium possibly junior syn O.O.excavatus
99	[1]	Orthocladius (Orthocladius) toyamakeleus Sasa, 1996							Jap
100	[1]j	Orthocladius (Orthocladius) trigonolabis Edwards, 1924	junior syn O.O.nitidoscutellatus
101	[1]j	Orthocladius (Orthocladius) tubicola Kieffer, 1909	junior syn O.O.pedestris
102	[1]	Orthocladius (Orthocladius) tusimopequeus Sasa & Suzuki, 1999							Jap
103	[1]	Orthocladius (Orthocladius) ulaanbaatus Sasa & Suzuki, 1997							Mongolia
104	[1]	Orthocladius (Orthocladius) uniradialis Blattacharyay, Ali & Chauduhri, 1991											o
106	[1]	Orthocladius (Orthocladius) wetterensis Brundin, 1956			[6,25]	[6,8,10]	[0,30]	3	eur	Italy		n
107	[1]	Orthocladius (Orthocladius) wiensi Saether, 1969						13				n
108	[1]	Orthocladius (Orthocladius) yugashimaensis Sasa, 1979							Jap		fe
109	[8]	Orthocladius Pe 10 Langton, 1991	Pe	probably conspecific of O.O.pedestris		[8]
110	[8]	Orthocladius Pe 2 Langton, 1991	Pe	probably conspecific of O.O.oblidens		[8]
111	[8]	Orthocladius Pe 3 Langton, 1991	Pe	probably conspecific of O.O.rivinus		[8]
112	[8]	Orthocladius Pe 4 Langton, 1991	Pe	probably conspecific of O.O.dentifer		[8]
113	[8]	Orthocladius Pe 5 Langton, 1991	Pe			[8]
114	[8]	Orthocladius Pe 6 Langton, 1991	Pe	probably conspecific of O.O.maius		[8]
115	[8]	Orthocladius Pe 7 Langton, 1991	Pe	probably conspecific of O.O.rhyacobius		[8]
116	[8]	Orthocladius Pe 8 Langton, 1991	Pe	probably conspecific of O.O.wetterensis		[8]
117	[8]	Orthocladius Pe 9 Langton, 1991	Pe	probably conspecific of O.O.rhyacobius		[8]
118	[8]	Orthocladius Pe13 Langton, 1991	Pe	probably conspecific of O.M.vaillanti		[8]
119	[1]	Orthocladius subg. Pogonocladius Brundin, 1956							eur
120	[1]	Orthocladius (Pogonocladius) consobrinus (Holmgren, 1869)			[6,26]	[8]	[7]		eur	Italy	fe
121	[1]	Orthocladius subg. Symposiocladius Cranston, 1982							eur
122	[1]	Orthocladius (Symposiocladius) annectens (Sæther, 1969)	n. comb.									n
123	[1]	Orthocladius (Symposiocladius) bilyji Sæther, 2004										n
124	[1]	Orthocladius (Symposiocladius) futianensis, Kong, Liu & Wang, 2012											o
125	[1]	Orthocladius (Symposiocladius) halvorseni Saether, 2004			[4]		[4]		eur	Norway
126	[1]	Orthocladius (Symposiocladius) holsatus Goetghebuer, 1937	sub smolandicus in [7] (see Fauna eura)	dorsocentrals biserial	[7,20]	[8,20]	[4,20]	1	eur			n	o
127	[1]	Orthocladius (Symposiocladius) lignicola Kieffer, 1914			[4]	[2,8]	[2,4]		eur	Italy	fe	n	o
128	[1]	Orthocladius (Symposiocladius) lunzensis Dettinger-Klemm, 2001			[20]	[4,20]	[4,20]		eur	Austria
129	[1]	Orthocladius (Symposiocladius) ruffoi Rossaro & Prato, 1991		conspecific with Rheorthocladius sp A. Thienemann [31]	[6,28]	[6,10]			eur	Italy
130	[1]	Orthocladius (Symposiocladius) schnelli Saether, 2004			[4]	[4]	[4]		eur	Norway Finland Russia	fe	n	o
131	[1]	Orthocladius (Symposiocladius) smolandicus Brundin, 1947		Langton & Cranston 1991 consider smolandicus junior syn of O. holsatus, Saether 2003(4) restores the species, bad hypop	[4,24]	[7,25]			eur	Sweden Finland France Switzerland		n
132	[1]j	Orthocladius (Symposiocladius) tryoni Soponis, 1977	junior syn O.S.lignicola
133	[8]	Orthocladius (Symposiocladius) Pe 1 Langton, 1991	Pe	probably conspecific of Chironomus.Pe.6		[8]

## Sheet: references
seq		References
	[0]	the present ppaer
61	[01]	01. Ashe, P.; O'Connor, J.P. A world catalogue of Chironomidae (Diptera). Part 2. Orthocladiinae. Two vols (Sections A, B); Irish Biogeographical Society, Dublin; 2012; [14]+xvi+p. 468, 6.+ p. 500https://www.nhbs.com/a-world-catalogue-of-chironomidae-diptera-part-2-2-volume-set-book
62	[02]	02. Cranston, P.S. The metamorphosis of Symposiocladius lignicola (Kieffer) n. gen., n. comb., a wood mining Chironomidae (Diptera) Ent. Scand. 1982, 13, 419-429.
63	[03]	03. Cranston, P.S.; Oliver, D.R.; Sæther, O.A. The adult males of Orthocladiinae (Diptera,Chironomidae) of the Holarctic region — Keys and diagnoses. In Chironomidae of the Holarctic region. Keys and diagnoses. Part 3. Adult males; Wiederholm T. Ed., Ent. Scand. Suppl. 1989, 34, 165–352.https://www.nhbs.com/chironomidae-of-the-holarctic-region-part-3-adult-males-book
64	[04]	04. Sæther, O.A. A review of Orthocladius subgenus Symposiocladius Cranston (Diptera, Chironomidae). Aquatic Insects 2003[4], 25(4), 281-317. https://www.tandfonline.com/doi/abs/10.1076/aqin.25.4.281.26221
65	[05]	05. Sæther, O.A. A new subgenus and new species of Orthocladius van der Wulp, with a phylogenetic evaluation of the validity of the subgenera of the genus (Diptera, Chironomidae) Zootaxa 2005 974, 1-56.https://www.biotaxa.org/Zootaxa/article/view/zootaxa.974.1.1
66	[06]	06. Rossaro, B.; Lencioni, V.; Casalegno, C.; Revision of West Palaearctic species of Orthocladius s. str. van der Wulp, 1874 (Diptera, Chironomidae, Orthocladiinae), with a new key to species. Studi Trent. Sci. Nat. Acta Biol. 2002[3], 79, 213-241. ["2002", publd ix.2003] [crossref]
67	[07]	07. Soponis, A.R. A revision of the Nearctic species of Orthocladius (Orthocladius) van der Wulp (Diptera, Chironomidae) Mem. Ent. Soc. Can. 1977, 102, 1-187.
68	[08]	08. Langton, P.H.; Visser, H. Chironomidae exuviae. A key to pupal exuviae of the West Palaearctic Region World Biodiv. Datab. CD ROM Ser.; ETI, Amsterdam, 2003 [crossref]
69	[09]	09. Langton, P.H.; Pinder, L.C.V. Keys to the adult male Chironomidae of Britain and Ireland; Freshwater Biol. Assoc., scient. Publ.: Ambleside, UK 2007, 64, Volume 1 & 2, 239 + 168 pp.
70	[10]	10. Langton, P.H.; Cranston, P.S. Pupae in nomenclature and identification, West Palaearctic Orthocladius s. str. (Diptera, Chironomidae) revised Syst. Ent. 1991, 16, 239-252.
71	[11]	11. Brundin, L. Transantarctic relationships and their significance, as evidenced by chironomid midges. With a monograph of the subfamilies Podonominae and Aphroteniinae and the austral Heptagyiae. Kungl. Svenska Vetenskapsakad. Handl., Fjärde[4th] Ser. 1966, 11(1), 1-472, pls 1-30.
72	[12]	12. Sæther, O.A. Some nearctic Podonominae, Diamesinae, and Orthocladiinae (Diptera, Chironomidae). Bull. Fish. Res. Bd Can. 1969, 170, 1-154.
73	[13]	13. Wirth, W.W.; Marston, N. A method for mounting small insects on microscope slides in Canada balsam Ann. ent. Soc. Am. 1968, 61, 783-784.
74	[14]	14. Sæther, O.A. Glossary of chironomid morphology terminology (Diptera, Chironomidae) Ent. Scand. Suppl. 1980, 14, 51 pp.
75	[15]	15. Langton, P.H. A key to pupal exuviae of West Palaearctic Chironomidae Huntingdon, Camb. 1991 386 pp.
104	[16]	R Core Team (2013). R: A language and environment for statistical computing. R Foundation for Statistical Computing, Vienna, Austria. URL http://www.R-project.org/.
76	[17]	16. Dixon, P. VEGAN, a package of R functions for community ecology. Journal of Vegetation Science 2003, 6, 927–930
77	[18]	17. Coffman, W.P.; Cranston, P.S.; Oliver, D.R.; Sæther, O.A. The pupae of Orthocladiinae (Diptera, Chironomidae) of the Holarctic region - Keys and diagnoses In Chironomidae of the Holarctic region. Keys and diagnoses. Part 2 - Pupae.; Wiederholm, T. Ed., Ent. Scand. Suppl. 1986, 28, 147-296
78	[19]	18. Caldwell, B. A. Description of the adult male and larva of Orthocladius (Orthocladius) vaillanti (Diptera, Chironomidae).In A festschrift honoring Mary and Jim Sublette. Part 1, Taxonomy and systematics of Chironomidae; Berg, M.B.; Ferrington, L.C.Jr.; Hayford, B.L. Eds., J. Kans. Ent. Soc. 1998[9], 71(3), 234-240. ("1998")
79	[20]	19. Dettinger-Klemm, P.M.A. The metamorphosis of Orthocladius (Symposiocladius) holsatus Goetghebuer, 1937, with the description of Orthocladius (Symposiocladius) lunzensis sp. n. (Diptera, Chironomidae). Aquatic Insects 2001, 23(1), 45-62. [publd 20.iv.2001.
80	[21]	20. Cranston, P.S. Morphological terminology and key to subfamilies. In Chironomidae (Diptera) of the Holarctic Region-Keys and Diagnoses - Larvae; Andersen, T., Cranston, P.S., Epler, J., Eds.; Insect Systematics and Evolution Supplement: Lund, Sweden, 2013; Volume 66, 13-23.https://www.nhbs.com/chironomidae-of-the-holarctic-region-keys-and-diagnoses-part-1-larvae-book
81	[22]	21. Andersen, T.; Sæther, O.A.; Cranston, P.S.; Epler, J. The larvae of Orthocladiinae (Diptera, Chironomidae) of the Holarctic Region — Keys and diagnoses. In Chironomidae (Diptera) of the Holarctic Region-Keys and Diagnoses - Larvae; Andersen, T., Cranston, P.S., Epler, J., Eds.; Insect Systematics and Evolution Supplement: Lund, Sweden, 2013; Volume 66, 189-385. https://www.researchgate.net/pu…
82	[23]	22. Stur, E.; Ekrem, T. The Chironomidae (Diptera) of Svalbard and Jan Mayen. Insects 2020, 11(3, paper 183), 1-103 [for online supporting data, see http,//v3.boldsystems.org/ for the public dataset DS-CHIRSV (doi,10.5883/DSCHIRSV)]. https://www.mdpi.com/2075-4450/11/3/183
83	[24]	23. Brundin, L. Zur Kenntnis der schwedischen Chironomiden. Arkiv Zoologi 1947, 39 A(3): 1-95.
84	[25]	24. Brundin, L. Zur Systematik der Orthocladiinae (Dipt. Chironomidae). Inst. Freshw. Res. Drottn. Rept. 1956, 37: 5-185.
85	[26]	25. Pinder, L.C.V.; Cranston, P.S. Morphology of the male imagines of Orthocladius (Pogonocladius) consobrinus and O. glabripennis with observations on the taxonomic status of O. glabripennis (Diptera, Chironomidae) Ent. Scand. 1976, 7, 19-23.
86	[27]	26. Magoga, G.; Montagna, M.; Marziali, L.; Rossaro, B. Revision of type and non-type material assigned to the genus Orthocladius by Goetghebuer (1940–1950), deposited in the Royal Belgian Institute of Natural Sciences (Diptera, Chironomidae). Acta ent. Musei nat.lis Pragae 2017, 57(2), 723-749.
87	[28]	27. Rossaro, B.; Prato, S. Description of six new species of the genus Orthocladius (Diptera, Chironomidae). Fragm. ent. 1991, 23(1), 59-68.
88	[29]	28. Formenti, M.; Rossaro, B. Autoecologia e valore indicatore di diverse specie del genere Orthocladius van der Wulp (Diptera, Chironomidae) Studi Trent. Sci. Nat., Acta Biol. 2009, 84, 5-10, ISSN 2035-7699
89	[30]	29. Schmid, P.E. A key to the larval Chironomidae and their instars from Austrian Danube region streams and rivers with particular reference to a numerical taxonomic approach. Part I. Diamesinae, Prodiamesinae and Orthocladiinae Wass. Abwass. Suppl. 1993, 3/93, 514 pp.
90	[31]	30. Thienemann, A. Bestimmungstabellen für die bis jetzt bekannten Larven und Puppen der Orthocladiinen (Diptera Chironomidae). Arch. Hydrobiol. 1944, 39(4), 551-664, pls IV-XXX.
91	[32]	31. Rossaro, B. Chironomidi, 2 (Diptera, Chironomidae, Orthocladiinae) In Guide per il riconoscimento delle specie animali delle acque interne italiane; Ruffo, S. Ed., 1982, 16, 80 pp. Cons. naz. Ric. AQ/1/171. Verona.
92	[33]	32. National Center for Biotechnology Information (NCBI)[Internet]. Bethesda (MD): National Library of Medicine (US), National Center for Biotechnology Information; [1988] – [cited 2021 Oct 26]. Available from: http://www.ncbi.nlm.nih.gov/genbank/
93	[34]	33. Gadawski, P.; Montagna, M.; Rossaro, B.; Giłka, W.; Pešić, V.; Grabowski, M.; Magoga, G. DNA barcoding reveals an unknown Chironomidae diversity from the freshwater biodiversity hot-spot of Skadar Lake: comparison between local and the European datasets, (manuscript in preparation, to be submitted).
94	[35]	34. Makarchenko, E. A., Makarchenko, M. A. Novye vidy khironomid roda Orthocladius van der Wulp, 1874 (Diptera, Chironomidae) s rossiiskogo Dal'nego Vostoka. (A new species of Orthocladius van der Wulp, 1874 (Diptera, Chironomidae) of the Russian Far East.) Evraziat. Entomol. Zh. (= Euroas. Entomol. J.) 2006, 5: 57-67.
95	[36]	35. Макарченко, Е.А., Макарченко, М.А. Новые находки хирономид (Diptera, Chironomidae, Orthocladiinae) на Дальнем Востоке и сопредельных территориях. III. Orthocladius van der Wulp Евразиат. энтомол. журн. Т. 7, вып. 2. В печати (New findings of chironomids (Diptera, Chironomidae, Orthocladiinae) in Far East and bordering territories III. Orthocladius van der Wulp, 1874 Evraziat. Entomol. Zh. (= …
96	[37]	36. Makarchenko, E. A, Makarchenko, M. A. Preliminary data on the chironomid fauna (Diptera, Chironomidae) of South Yakutia. Evraziat. Entomol. Zh. (= Euroas. Entomol. J.) 2012, 11, Suppl. 2: 67-84.
97	[38]	37. Sasa, M. A morphological study of adults and immature stages of 20 Japanese species of the family Chironomidae (Diptera) Res. Rep. natn. Inst. envir. Stud. 1979, 7: 1-149.
98	[39]	38. Sasa, M. Studies on chironomid midges of the Tama River. Part 3. Species of the subfamily Orthocladiinae recorded at the summer survey and their distribution in relation to the pollution with sewage Waters. Res. Rep. natn. Inst. envir. Stud. 1981, 29: v-viii, 1-77.
99	[40]	39. Sasa, M. Studies on chironomid midges in lakes of the Nikko National Park. Part II. Taxonomical and morphological studies on the chironomid species collected from lakes in the Nikko National Park. Res. Rep. natn. Inst. envir. Studs, Japan 1984, 70: vii-x, 19-215. [publd +31.iii.1984]
101	[41]	Makarchenko, E.A.; Makarchenko, M.A. Fauna and distribution of the Podonominae, Diamesinae, Prodiamesinae and Orthocladiinae (Diptera, Chironomidae) of the Russian Far East and bordering territory.Vladimir Ya. Levanidov’s Biennial Memorial Meetings. 2017, Vol. 7 Vladivostok: FSCEATB FEB RAS, 127–142.
102	[42]	Rossaro, B., Pirola, N., Marziali, L., Magoga, G., Boggero, A., Montagna, M. 2019 An updated list of chironomid species from Italy with biogeographic considerations (Diptera, Chironomidae). Biogeographia - J. integrative Biogeogr., 2019, 34: 59-85.
103	[43]	Lods-Crozet, B., Lencioni, V., Brittain, J.E., Marziali, L., Rossaro, B. Contrasting chironomid assemblages in two high Arctic streams on Svalbard. Fundamental and Applied Limnology, Archiv für Hydrobiologie, 2007, 170/3: 211–222. DOI: 10.1127/1863-9135/2007/0170-0211
3
5
7
9
15
17
19
22
24
26
28
29
32
37
39
41
42
47
50
52
54
56
58
59
60

## Sheet: larva meas
species	station	date or sample number	type, reared, other	Dm/Dl_Larva	AR Larva	A1Length/wide	A1Larva	A2-5	A1w	Dm	Dl1	A2	A3	A4	A5	LO diam
decoratus	IRSNB	21_544
decoratus	NHM	B89_764
decoratus	NHM	B89_774
decoratus	NHMtype	lectotype	lectotype
decoratus	svalb	03.VIII.02	a0	1.90018	2.10769	3.08625	45.8	21.73	14.84	20.94	11.02	11.5	3.89	2.06	3.53
decoratus	svalb	03.VIII.02	a5	1.7198	1.49347	2.65648	43.46	29.1	16.36	20.93	12.17	10.9	3.9	4	4
decoratus	svalb	03.VIII.02	a8	1.65338	1.66257	3.1082	47.4	28.51	15.25	19.08	11.54	9.7	4	3.3	5
decoratus	svalb	03.VIII.02	a4	2.05619	1.85899	3.81527	61.96	33.33	16.24	20.86	10.145	13.3	4.9	4.9	4.5
decoratus	svalb	03.VIII.02	a7	1.88118	1.45005	3.12356	46.01	31.73	14.73	19.79	10.52	13.9	5.2	4.4	4.5
decoratus	svalb	03.VIII.02	a6	1.73913	1.0687	3.0479	42	39.3	13.78	20	11.5	16.21	6.33	5.72	4.74
decoratus	svalb	03.VIII.02	a1	2.03867	1.66836	3.84997	55.94	33.53	14.53	21.09	10.345	14.3	6.4	4.6	3.5
decoratus	svalb	03.VIII.02	a9	1.41667	1.82349	3.72975	53.41	29.29	14.32	17	12
decoratus	Wbyelva	03.VIII.03	D2	1.26508	1.98855	3.06471	52.1	26.2	17	15.94	12.6	12.39	3.83	4.535	3.74
decoratus	Wbyelva	03.VIII.03	U2	1.69033	1.95292	2.84089	53.92	27.61	18.98	19.76	11.69	7.91	5.1	3.54	3.13
decoratus	Wbyelva	03.VIII.03	D2a	1.29365	1.55691	3.53569	51.02	32.77	14.43	16.3	12.6	13.69	5.54	4.9	5.41
dentifer	NHM	B36764		1.67835	1.66022	3.24428	50.2745	30.2818	15.4964	19.2445	11.4664
dentifer	NHM	B76364
dentifer	NHM	B766A425
euorthocladius					1.41379		41	29
excavatus	Arch.Zool.	1947	lectotype
excavatus	ComoBellaggio	96.II.09
excavatus	ComoBellagio	96.II.09
excavatus	ComoOnno	96.II.09
excavatus	ComoOnno	96.III.15
excavatus	ComoOnno	96.III.15		2.86069	3.42516
excavatus	Cusago	97.III.16
excavatus	MaggioreAngera	95.II.02		4.38083	1.62728
excavatus	NHM	B764A416	NHM	2.02426	1.81379
excavatus	NHM	B766A425	NHM	2.02426	1.81379
excavatus	NHM
excavatus	NHM	B764A416	NHM	2.02426	1.81379
excavatus	NHM	B766A385
excavatus	PoCRTN	82.XII.02
excavatus	Taro2Compiano	01.II.07
excavatus	Taro2Compiano	02.I.10		3.31632						33.13	9.99
excavatus	Taro2Compiano	02.V.06
excavatus	tic_alpha	81.I.00	reared	2.04579	1.90286	3.10652	51.91	27.28	16.71	19.66	9.61
excavatus	tic_alpha	81.I.00	reared	2.02628	1.90286	3.10652	51.91	27.28	16.71	20.82	10.275
excavatus	tic_delta	81.I.00	reared	1.95844	1.80617	3.73079	59.73	33.07	16.01	23.56	12.03
excavatus	tic_media	81.I.00	rearedmedia	2.01017	1.87063	3.31461	54.5167	29.21	16.4767	21.3467	10.6383
excavatus	TicCugg	01.I.14		2.04201	1.85151	4.10245	56.86	30.71	13.86	18.47	9.045	15.12	4.44	2.05	2.69
excavatus	ticgamma	81.I.00		1.90214	1.84219	3.70272	55.8	30.29	15.07	21.77	11.445
excavatus	Ticino	79.II.25
excavatus	Ticino	81.I.15
excavatus	Ticino	93.III.20
excavatus	ticturb	79.II.25
excavatus	Vetoio	92.IV.13
glabripennis	Curone	17.III.15	reared	2.81129	2.15131	3.37981	63.27	29.41	18.72	30.39	10.81
glabripennis	Curone	17.III.15
glabripennis	Garonna	det langton		2.86069	3.42516
glabripennis	Garonna	det langton
glabripennis	IRSNB	26	IRSNB	2.86069	3.42516
glabripennis	IRSNB	26	IRSNB
glabripennis	IRSNB	Destelbergen	IRSNB	2.86069	3.42516
glabripennis	IRSNB	Destelbergen25	IRSNB
glabripennis	IRSNB	IRSNB	lectotype	2.86069	3.42516
glabripennis	IRSNB	IRSNB	lectotype
glabripennis	langton	langton	langton	2.86069	3.42516
glabripennis	langton	langton	langton
glabripennis	NHM		NHM
glabripennis	NHM		NHM
glabripennis	Zwider	05.IV.19		2.86069						32.24	11.27
glabripennis	Zwider	05.IV.19
glabripennis	Zwider	05.IV.19
glabripennis	Zwider	05.IV.19
holsatus	Aq_Ins	23_2001		5.71429						40	7	9-11	5-7	3-5	4
holsatus	Aq_Ins	23_2001		4.5						45	10
holsatus	Aq_Ins	23_2001
holsatus	Aq_Ins	23_2001
holsatus	Aq_Ins	23_2001
lignicola	IRSNB	IRSNB10
lignicola	Soponis(tryoni)
lignicola	Soponis(tryoni)
lignicola	temu'	78.VI.09
lignicola	temu'	78.VI.09
lignicola	valbione	79.V.06
lignicola	valbione	79.V.06
lignicola	Vera	88III12
lignicola	Vera	88III12
lignicola	Viola	85IX00
lignicola	Viola	85IX00
maius		holotype
maius		holotype
marchettii	Aterno	90.I.03	reared	2.05086	2.00412	3.58276	68.18	34.02	19.03	28.63	13.96	15.98	6.15	3.77	3.61
marchettii	Aterno	90.II.02	type
marchettii	Aterno	90.II.26
marchettii	Aterno	90.III.03
marchettii	Aterno	92.II.28	Mpe
marchettii	Ceno	15.I.29	reared	2.5441	2.02516	3.22662	60.37	29.81	18.71	25.67	10.09
marchettii	Ceno	15.I.29	reared	2.56452	2.02516	3.22662	60.37	29.81	18.71	28.62	11.16
marchettii	Ceno	15.I.29	reared
marchettii	Ceno	15.I.29	reared
marchettii	Ceno	15.I.29	reared
marchettii	Cenomedia	15.I.29	reared (mean)	2.55431	2.02516	3.22662	60.37	29.81	18.71	27.145	10.625
marchettii	Taro	00.V.02			1.94897
marchettii	Taro	00.V.02
marchettii	Vetolio	92.IV.13
oblidens	Aveyron
oblidens	Aveyron				2
oblidens	ComoOnno			4.14485	1.75678
oblidens	ComoOnno
oblidens	NHM	B779A3		4.14485	1.75678
oblidens	NHM	B779A3		4.14485	1.75678
oblidens	NHM	B779A3
oblidens	NHM	B779A3
oblidens	PoTrino	68.V.09	b	3.94297	2.23985	2.37154	48	21.43	20.24	33.74	8.557
oblidens	PoTrino	68.V.09	a	3.94297	2.23577	2.86219	50.26	22.48	17.56	33.74	8.557
oblidens	PtoAdda	83.XII.13		3.63636	1.82441	3.42759	59.64	32.69	17.4	36.8	10.12
oblidens	PtoAdda	83.XII.13
oblidens	PvePtoMorone	80.V.29
oblidens	PvePtoMorone	80.V.29
oblidens	PvePtoMorone	80.V.29
oblidens	PvePtoMorone	80.V.29
oblidens	Serio	04.II.28	reared	4.6266	1.57209	2.33262	54.63	34.75	23.42	36.18	7.82
oblidens	Seveso	74.IV.00		3.74617	2.53646	2.64282	53.57	21.12	20.27	34.24	9.14
oblidens	Soponis	1977	type
oblidens	Soponis	1977	type
oblidens	zitt	91.I.14		3.9555	1.90158	4.14134	62.41	32.82	15.07	32	8.09
obumbratus	caldwell	nearctic
obumbratus	caldwell	nearctic
obumbratus	Ithaca	Cornell	type
obumbratus	Ithaca	Cornell	type
obumbratus
obumbratus
obumithaca carlotta
obumithaca carlotta
obumStck
obumStck
orthocladius_spp	Chiareggio	98.VII.30			1.57271	3.94588	55.045	35	13.95			15.025	7.59	5.16	4.02
orthocladius_spp	DezzoB2	89.VI.14		2.18783	1.39495	3.69537	57.5	41.22	15.56	25.16	11.5
orthocladius_spp	DezzoD5			1.85775	1.48695	3.42011	45.59	30.66	13.33	17.37	9.35
pedestris	taro	01.V.04
pedestris	taro	02.IV.23	reared	2.18074	2.22676	3.86068	65.4	29.37	16.94	27.51	12.615
rhyacobius	Caorso	75.V.00		3.64951	1.67933	3.43616	54.36	32.37	15.82	31.55	8.645
rhyacobius	Elvo	01.V.21		3.38733	1.98071
rhyacobius	Elvo	01.V.21
rhyacobius	Lambro	04.VIII.30		3.38733	1.98071
rhyacobius	Lambro	04.VIII.30
rhyacobius	Lambro	05.III.16		3.38733	1.98071
rhyacobius	Lambro	05.III.16
rhyacobius	Lambro	16.III.02		3.38733	1.98071
rhyacobius	Lambro	16.III.02
rhyacobius	lambro2	77.XII.27		3.52443	1.59802	2.85083	51.6	32.29	18.1	37.87	10.745					8.95
rhyacobius	Lambro2	77.XII.27
rhyacobius	Lambro2	77.XII.27
rhyacobius	oleggio	20.III.26		2.94588						31.3	10.625
rhyacobius	oleggio	20.III.26
rhyacobius	Pioverna	02.I.17
rhyacobius	Pioverna	02.I.17
rhyacobius	Pioverna	02.II.02
rhyacobius	Pioverna	02.II.02
rhyacobius	Pioverna	02I17	reared	4.38083	1.62728	3.36397	54.53	33.51	16.21	34.28	7.825	15.76	4.91	4.11	3.16
rhyacobius	PoCRTN	80.XII.18	reared	3.3592	2.06035	4.04408	58.72	28.5	14.52	27.635	8.22667
rhyacobius	PoCRTN	80.XII.18	reared	3.43824	2.25282	4.33184	57.83	25.67	13.35	28.95	8.42
rhyacobius	PoCRTNmedia	80.XII.18	rearedmedia	3.39872	2.15659	4.18796	58.275	27.085	13.935	28.2925	8.32333
rhyacobius	sangro	90.I.24		3.47104	1.76745	3.6857	58.75	33.24	15.94	35.96	10.36					10.46
rhyacobius	Taro	02I10
rhyacobius	Taro	02I10
rhyacobius	TaroCaseNicola	02.I.10	reared	4.08943	1.82544	3.09982	51.24	28.07	16.53	38.87	9.505
rhyacobius	Vera	89.XII.01
rhyacobius	Vera	89.XII.01
rivicola	sangro	90.I.24		4.22183	1.5808	3.30262	56.64	35.83	17.15	35.97	8.52					14.39
rivinus	Aterno	90.II.26	reared	2.64173	1.74929	3.49312	55.82	31.91	15.98	25.07	9.49
rivinus	Aterno	92.II.06	MPe
rubicundus	acqualba	76.V.00
rubicundus	aso	79.III.28
rubicundus	caldwell
rubicundus	caldwell
rubicundus	IRSNB	27_Virten
rubicundus	MolinaCameri	94.X.30		2.8202	1.68149	3.33625	41.97	24.96	12.58	23.45	8.315
rubicundus	MolinaCameri	94.X.30		2.8202	1.66907	3.81771	43.98	26.35	11.52	23.45	8.315
rubicundus	Monno	00.V.15		2.16344	1.7557	4.42834	54.69	31.15	12.35	20.12	9.3
rubicundus	OglioPalazzolo	78.XI.15	reared Pe Le	2.72193	2.24505	3.66339	52.13	23.22	14.23	23.15	8.505	10.47	5.54	3.31	2.56
rubicundus	sangro	89.V.09		2.96278	1.60924	3.19833	45.96	28.56	14.37	30.25	10.21					8.99
rubicundus	TaroBorgovalTaro	02.III.01	reared	2.66109	1.57528	2.82483	42.895	27.23	15.185	17.51	6.58
rubicundus	TaroCaseNicola	02.I.10
rubicundus	TaroCaseNicola	02.I.10
rubicundus	TaroCompiano	02.I.22
rubicundus	TaroCompiano	02.I.22
rubicundus	ticino	78.XI.12		2.64401	1.79691	3.45712	49.99	27.82	14.46	20.425	7.725
rubicundus	ticino	79.I.14		1.81742	2.00311	4.87377	64.48	32.19	13.23	19.41	10.68
rubicundus	trino	67.VI.10		2.14089						17.52	8.1835
ruffoi	Bedole	90.IX
ruffoi	IRSNB
ruffoi	Muzza	02.I.25
ruffoi	Vera	92.V.04
ruffoi	Vera	92.V.05
rufiventris	Lambro	78.I.26		2.58583	1.45801	3.023	44.287	30.375	14.65	24.515	9.4805	11.74	3.93	3	2.98
trigonolabis	NHM	A401.1
wetterensis	CskeBud
wetterensis	elvo	00.I.21	reared	3.06521	1.24542	2.80389	46.18	37.08	16.47	30.79	10.045
wetterensis	elvo	00.I.21	reared	3.25528	1.43156	2.89731	48.53	33.9	16.75	26.97	8.285
wetterensis	elvo	01.IV.21
wetterensis	elvo	01.XII.09	reared	3.41058	1.5247	3.12046	51.55	33.81	16.52	37.38	10.96
wetterensis	elvo	01.XII.09	reared
wetterensis	elvomedia	01.XII.09	rearedmedia	3.24369	1.40056	2.94055	48.7533	34.93	16.58	31.7133	9.76333
wetterensis	Lambro	77.XI.16
wetterensis	PNAbr	78.V.19
wetterensis	tarobedonia	02.I.10		2.57512	1.39259	3.0711	46.22	33.19	15.05	21.94	8.52

## Sheet: legenda
sheet
distrib	seq	record number
distrib	ref	bibliographic references
distrib	genus species author	species name, author, year
distrib	nomenclature notes	senior, junior synonym, new combination
distrib	taxonomic notes	notes on taxonomy
distrib	adult males	adult males descriptions in References
distrib	pupal exuviae	pupal exuviae descriptions in References
distrib	larvae	larvae descriptions in References
distrib	DNAbarcode	specimens number with DNA barcode cited in genbank https://www.ncbi.nlm.nih.gov/genbank/ (at 5/12/2021)
distrib	westpalaearctic(WP)	eur = Europe, Jap = japan
distrib	WP detail	country in WP e.g. Italy, Romania, et c.
distrib	eastpalaearctic	fe = Far East, eSib = east Siberia
distrib	nearctic	n
distrib	oriental	o
distrib
distrib	[n]	the number in [] is the number of paper as cited in References
distrib	[0]	[0] means that the species is cited in this article
distrib	[1]j	the species is reported in [1] as junior synonym
distrib	[1]d	the species is reported in [1] as nomen dubium
references	in the first column are the number of References cited in the text, [41, 42, 43] are cited only in this Appendix not in the text
larva meas	detailed measures of larval characters, measures in micron
larva meas	character description	abbrev
larva meas	Dm Dl1 ratio	Dm/Dl_Larva
larva meas	A1 A2-5 ratio	AR Larva
larva meas	ratio between length and width of A1	A1Length/wide
larva meas	first antennal segment length	A1Larva
larva meas	combined antennal segment 2-5 length	A2-5
larva meas	first antennal segment width	A1w
larva meas	median mentum tooth wide	Dm
larva meas	first lateral mentum tooth wide	Dl1
larva meas	A2 antennal segment length	A2
larva meas	A3 antennal segment length	A3
larva meas	A4 antennal segment length	A4
larva meas	A5 antennal segment length	A5
